# Supplementary material for: Home range and habitat use of vervet monkeys in the urban forest mosaic landscape of Durban, eThekwini Municipality, KwaZulu-Natal, South Africa
Source: Springer Nature journal article supplement (doi:10.1007/s11252-023-01396-y), 2023-08-14
Supplement: MOESM1 [file 25923970]

## Supplementary information

a.

**Supplementary information Fig. S1.** Home range of vervet monkeys in the present study wherea. shows the overall mean (± SE) home range estimates between sexes for vervet monkeys at the 95% level; b. the overall mean (± SE) home range estimates between sexes for vervet monkeys at the 50% level; c. the overall mean (± SE) home range estimates between locations for vervet monkeys at the 95% level and d. the overall mean (± SE) home range estimates between locations for vervet monkeys at the 50% level.


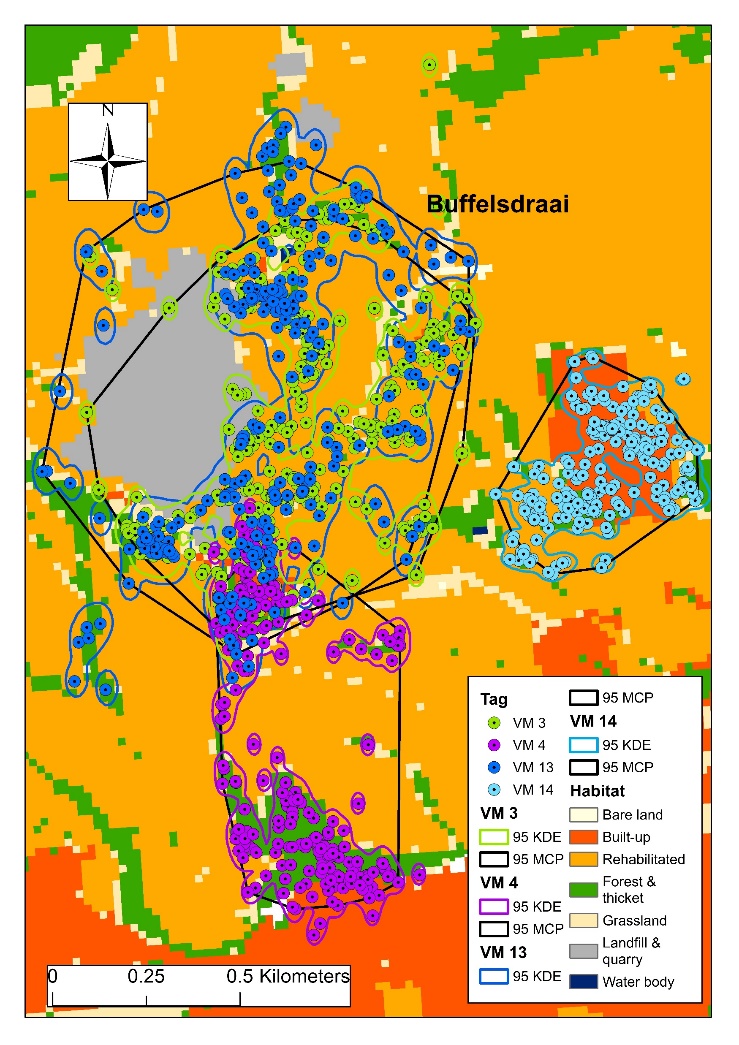

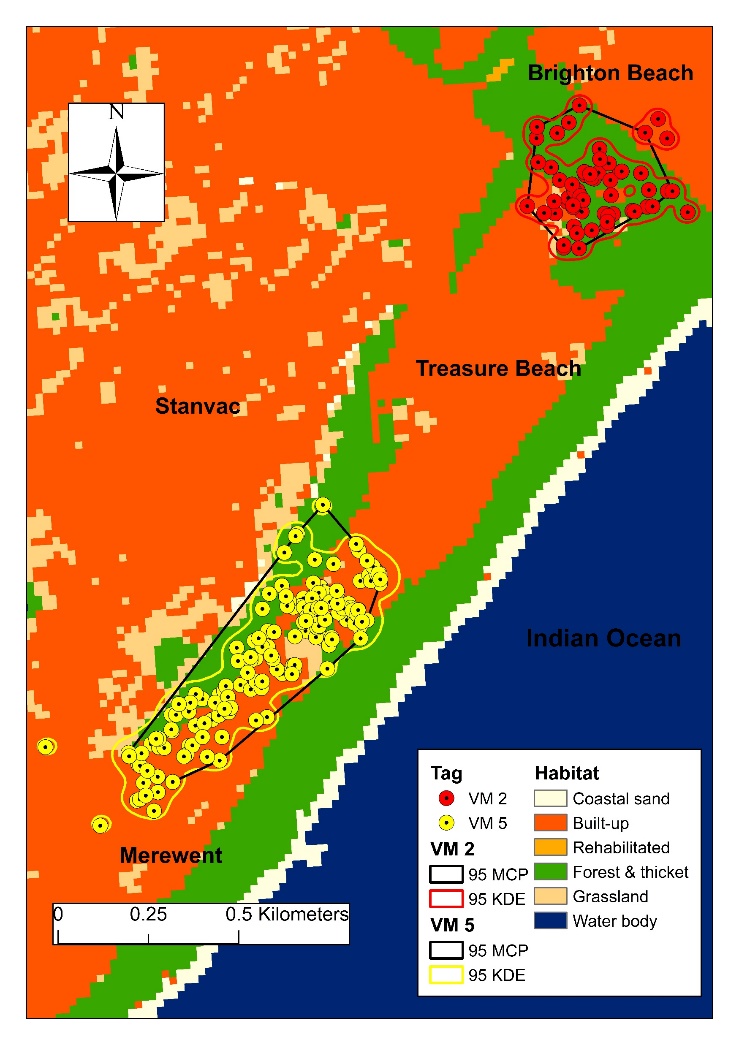


**Supplementary information Fig. S2.** Vervet monkey (*n* = 6) GPS fixes (dots) within 95% MCP and KDE boundary showing the main land use types of two locations within the urban forest mosaic landscape in the eThekwini Municipality, KwaZulu-Natal, South Africa.
